# Supplementary material for: Counting the Dead: 17 Million Vertebrates Directly Killed by the 2020’s Wildfires in the Pantanal Wetland, Brazil
Source: Research Square preprint supplement (doi:10.21203/rs.3.rs-859794/v1), 2021-09-07
Supplement: Supplementary file 1 [file 104438e498a127f3194170ca.docx]

**Supplementary information**

Table 3. Identified vertebrate species detected along transect lines, directly killed by the 2020’s wildfire in the Brazilian portion of Pantanal wetland. Groups refer to small (S) and medium to large (L) bodied vertebrates.

| **Group** | **Sub-group** | **Identified species** |
| --- | --- | --- |
| S | Amphibians | *Leptodactylus* *luctator* |
|  |  | *Leptodactylus macrosternum* |
|  |  | *Pseudis platensis* |
|  |  | *Rhinella diptycha* |
|  |  | *Scinax acuminatus* |
|  | Small snakes | *Chironius dixoni* |
|  |  | *Chironius laurenti* |
|  |  | *Helicops boitata* |
|  |  | *Helicops leopardinus* |
|  |  | *Hydrops caesurus* |
|  |  | *Liophis militaris* |
|  |  | *Palusophis bifossatus* |
|  |  | *Pseudoeryx plicatilis* |
|  |  | *Amerotyphlops* sp. |
|  | Small lizards | *Copeoglossum nigropunctatum* |
|  |  | *Manciola guaporicola* |
|  |  | *Ophiodes* sp. |
|  | Small birds | *Chionomesa fimbriata* |
|  |  | *Columbina talpacoti* |
|  |  | *Crotophaga ani* |
|  |  | *Cyanocorax chrysops* |
|  |  | *Leptotila rufaxilla* |
|  |  | *Leptotila verreauxi* |
|  |  | *Picumnus albosquamatus* |
|  |  | *Procacicus solitarius* |
|  |  | *Ramphastos toco* |
|  |  | *Sporophila collaris* |
|  |  | Tinamidae |
|  | Small marsupials | *Cryptonanus chacoensis* |
|  |  | *Philander canus* |
|  | Small rodents | *Holochilus chacarius* |
|  |  | *Sylvilagus brasiliensis* |
| L | Large lizards | *Dracaena paraguayensis* |
|  |  | *Iguana iguana* |
|  | Anacondas | *Eunectes notaeus* |
|  | Chelonians | *Chelonoidis carbonarius* |
|  | Caiman | *Caiman yacare* |
|  | Medium to large birds | *Aramides cajaneus* |
|  |  | *Aramus guarauna* |
|  |  | Ciconiidae |
|  |  | *Crax fasciolata* |
|  |  | *Crypturellus undulatus* |
|  |  | *Ortalis canicollis* |
|  |  | *Penelope ochrogaster* |
|  | Armadillos | *Dasypus novemcinctus* |
|  |  | *Euphractus sexcinctus* |
|  | Anteaters | *Tamandua tetradactyla* |
|  | Primates | *Alouatta caraya* |
|  |  | *Plecturocebus* cf. *pallescens* |
|  |  | *Sapajus cay* |
|  | Medium to large rodents | *Coendou prehensilis* |
|  |  | *Dasyprocta azarae* |
|  |  | *Hydrochoerus hydrochaeris* |
|  | Ungulates | *Mazama americana* |
|  |  | *Tayassu pecari* |
